# Supplementary material
Source: PubMed Central journal article supplement (PMC5326595)
Supplement: NIHMS828259-supplement.pdf [file NIHMS828259-supplement.pdf]

**Supplementary Material 1:** A detailed list of the *ICD-9-CM* codes used in the study and their corresponding definitions.

| <i>ICD-9-CM</i> Codes and Definitions                          |                                                                                                                                                                         |
|----------------------------------------------------------------|-------------------------------------------------------------------------------------------------------------------------------------------------------------------------|
| <b>Code</b>                                                    | <b>Definition</b>                                                                                                                                                       |
| <i>Diagnosis codes used to define CNS Infection or abscess</i> |                                                                                                                                                                         |
| 003.21                                                         | Salmonella meningitis                                                                                                                                                   |
| 006.5                                                          | Amebic brain abscess                                                                                                                                                    |
| 013.00                                                         | Tuberculous meningitis, unspecified                                                                                                                                     |
| 013.01                                                         | Tuberculous meningitis, bacteriological or histological examination not done                                                                                            |
| 013.02                                                         | Tuberculous meningitis, bacteriological or histological examination unknown (at present)                                                                                |
| 013.03                                                         | Tuberculous meningitis, tubercle bacilli found (in sputum) by microscopy                                                                                                |
| 013.04                                                         | Tuberculous meningitis, tubercle bacilli not found (in sputum) by microscopy, but found by bacterial culture                                                            |
| 013.05                                                         | Tuberculous meningitis, tubercle bacilli not found by bacteriological examination, but tuberculosis confirmed histologically                                            |
| 013.06                                                         | Tuberculous meningitis, tubercle bacilli not found by bacteriological or histological examination, but tuberculosis confirmed by other methods [inoculation of animals] |
| 036.0                                                          | Meningococcal meningitis                                                                                                                                                |
| 047.0                                                          | Meningitis due to coxsackie virus                                                                                                                                       |
| 047.1                                                          | Meningitis due to echo virus                                                                                                                                            |
| 047.8                                                          | Other specified viral meningitis                                                                                                                                        |
| 047.9                                                          | Unspecified viral meningitis                                                                                                                                            |
| 049.0                                                          | Lymphocytic choriomeningitis                                                                                                                                            |
| 049.1                                                          | Meningitis due to adenovirus                                                                                                                                            |
| 053.0                                                          | Herpes zoster with meningitis                                                                                                                                           |
| 054.72                                                         | Herpes simplex meningitis                                                                                                                                               |
| 072.1                                                          | Mumps meningitis                                                                                                                                                        |
| 091.81                                                         | Acute syphilitic meningitis (secondary)                                                                                                                                 |
| 094.2                                                          | Syphilitic meningitis                                                                                                                                                   |
| 098.82                                                         | Gonococcal meningitis                                                                                                                                                   |
| 100.81                                                         | Leptospiral meningitis (aseptic)                                                                                                                                        |
| 320.0                                                          | Hemophilus meningitis                                                                                                                                                   |
| 320.1                                                          | Pneumococcal meningitis                                                                                                                                                 |
| 320.2                                                          | Streptococcal meningitis                                                                                                                                                |
| 320.3                                                          | Staphylococcal meningitis                                                                                                                                               |
| 320.7                                                          | Meningitis in other bacterial diseases classified elsewhere                                                                                                             |
| 320.81                                                         | Anaerobic meningitis                                                                                                                                                    |
| 320.82                                                         | Meningitis due to gram-negative bacteria, not elsewhere classified                                                                                                      |

|                                                                                 |                                                                                      |
|---------------------------------------------------------------------------------|--------------------------------------------------------------------------------------|
| 320.89                                                                          | Meningitis due to other specified bacteria                                           |
| 320.9                                                                           | Meningitis due to unspecified bacterium                                              |
| 321.0                                                                           | Cryptococcal meningitis                                                              |
| 321.1                                                                           | Meningitis in other fungal diseases                                                  |
| 321.2                                                                           | Meningitis due to viruses not elsewhere classified                                   |
| 321.3                                                                           | Meningitis due to trypanosomiasis                                                    |
| 321.8                                                                           | Meningitis due to other nonbacterial organisms classified elsewhere                  |
| 324.0                                                                           | Intracranial abscess                                                                 |
| 324.9                                                                           | Intracranial and intraspinal abscess of unspecified site                             |
| 996.63                                                                          | Infection and inflammatory reaction due to nervous system device, implant, and graft |
| <i>Procedure and diagnosis codes used to define VPS revision or malfunction</i> |                                                                                      |
| 02.41                                                                           | Irrigation and exploration of a ventricular shunt                                    |
| 02.42                                                                           | Replacement of ventricular shunt                                                     |
| 02.43                                                                           | Removal of ventricular shunt                                                         |
| 54.95                                                                           | Distal shunt revision                                                                |
| 996.2                                                                           | Shunt malfunction                                                                    |
| <i>Diagnosis codes used in secondary analysis</i>                               |                                                                                      |
| 432.1                                                                           | Non-traumatic subdural hematoma                                                      |
| Abbreviations: CNS, central nervous system; VPS, ventriculoperitoneal shunt.    |                                                                                      |
